# Supplementary material for: SAHA Overcomes 5-FU Resistance in IFIT2-Depleted Oral Squamous Cell Carcinoma Cells
Source: MDPI journal article supplement (doi:10.3390/cancers12123527), 2020-11-26
Supplement: s1 [file s1]

# Supplementary Materials: SAHA Overcomes 5-FU Resistance in IFIT2-Depleted Oral Squamous Cell Carcinoma Cells

Prabha Regmi, Kuo-Chu Lai, Chung-Ji Liu and Te-Chang Lee

**Table S1.** Primer sequences for quantitative real-time PCR analysis.

| Gene  | Forward Primer               | Reverse Primer                 |
|-------|------------------------------|--------------------------------|
| TS    | 5'-GGAAGGGTGTTTTGGAGGAGTT-3' | 5'-AGATTTTCACTCCCTTGGAAGACA-3' |
| TP    | 5'-GCTGGAGTCTATTCTGGAT-3'    | 5'-ACTGAGAATGGAGGCTGTGATG-3'   |
| OPRT  | 5'-GCGTCTTCTGAGTCAGGTTG-3'   | 5'-GCATCTGCTAGCTGCAACAG-3'     |
| TK1   | 5'-GTTTTTCCCTGACATCGTGGA-3'  | 5'-CGAGCCTCTTGGTATAGGCG-3'     |
| GAPDH | 5'-GGAGTCCCTGCCACACTCA-3'    | 5'-GCCCCTCCCCTCTTCAAG-3'       |

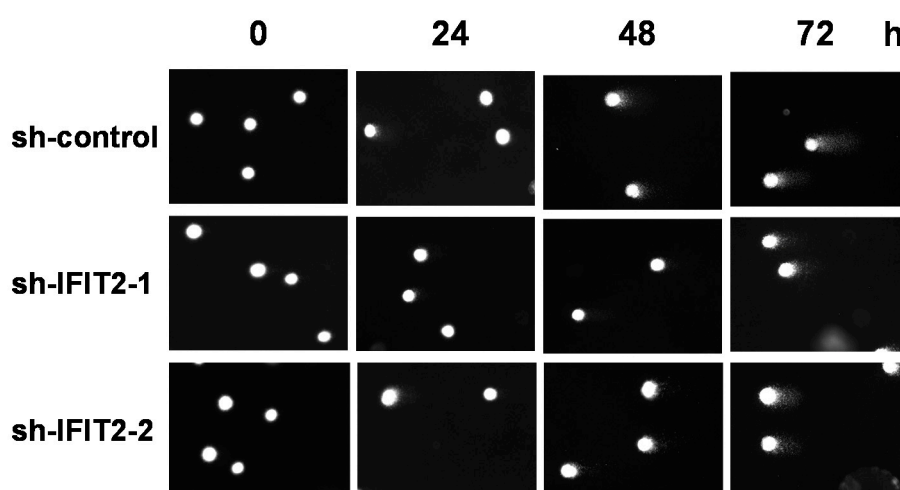

**Figure S1.** Representative images of Comet assay. Growing sh-control, sh-IFIT2-1 and sh-IFIT2-2 cells were treated with 10mM 5FU for 12, 24, 48 and 72 h. At the end of treatment, the cells were harvested and subjected to a comet assay as described in the Materials and Methods.

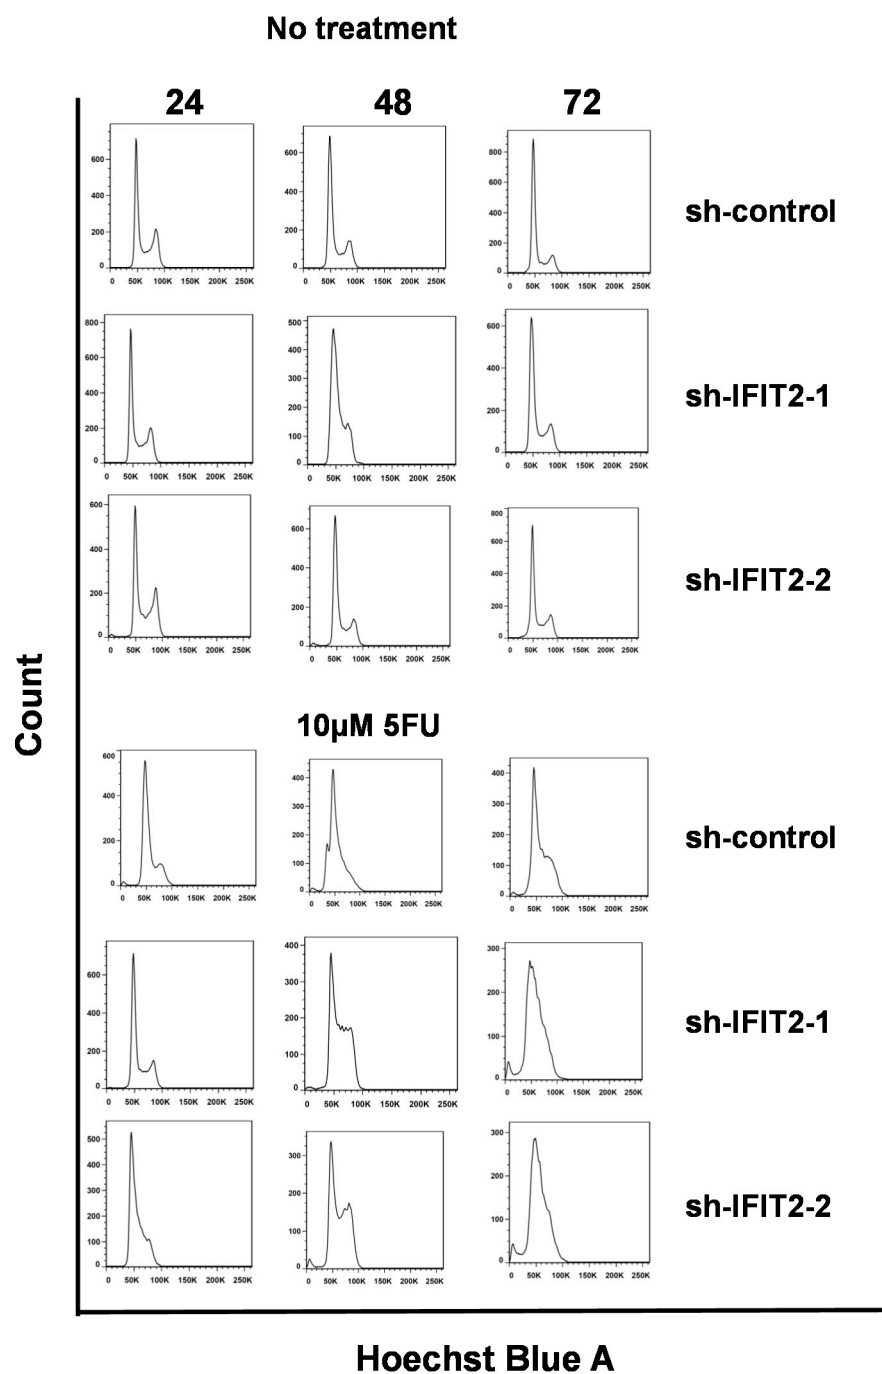

**Figure S2.** Representative histograms of cell-cycle analysis. Growing sh-control, sh-IFIT2-1 and sh-IFIT2-2 cells were treated with 10 µM 5-FU for 24, 48 and 72 h. and the cell-cycle analysis was performed using the Hoechst dye as described in methods.

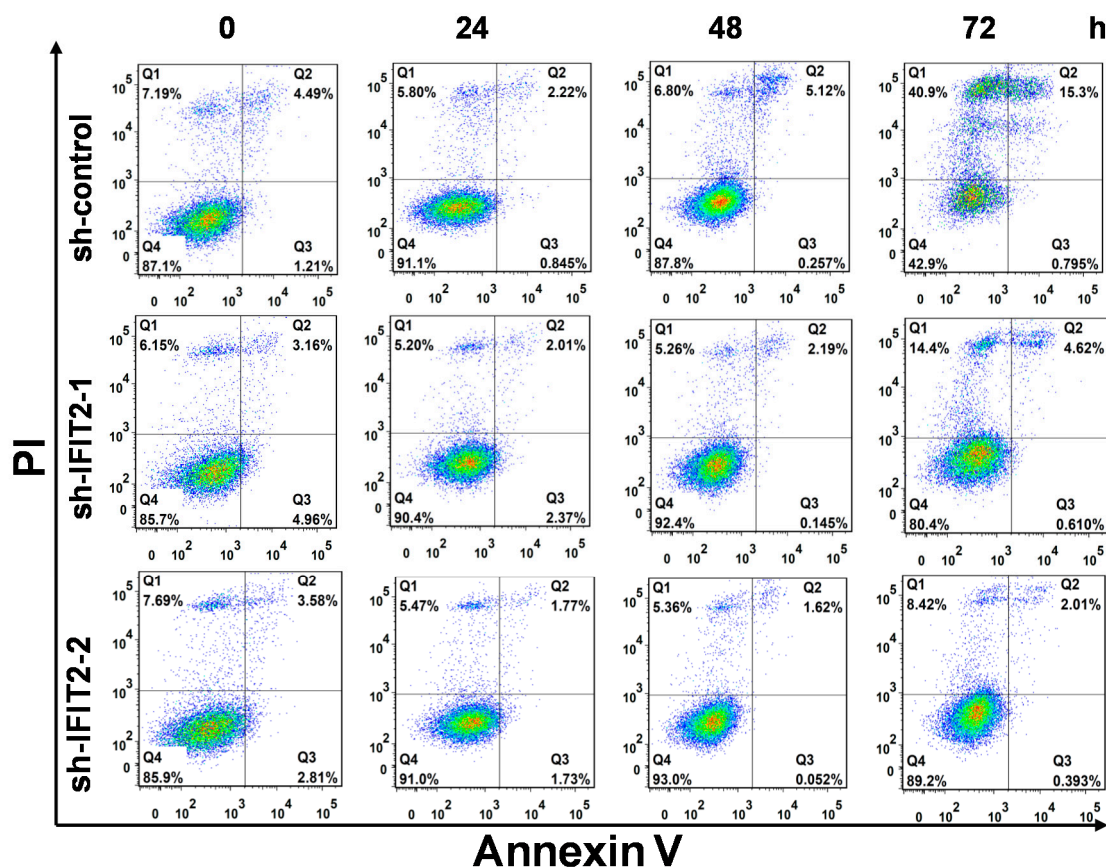

**Figure S3.** Representative image of annexin V staining for apoptosis analysis using flow cytometry. Cells were treated with 5-FU for 24, 48 and 72 h, stained with annexin V-APC and PI, and subjected to flow cytometric analysis. Q1, Q2, Q3, Q4 represent necrosis, late apoptosis, early apoptosis and live cells respectively.

Figure 1

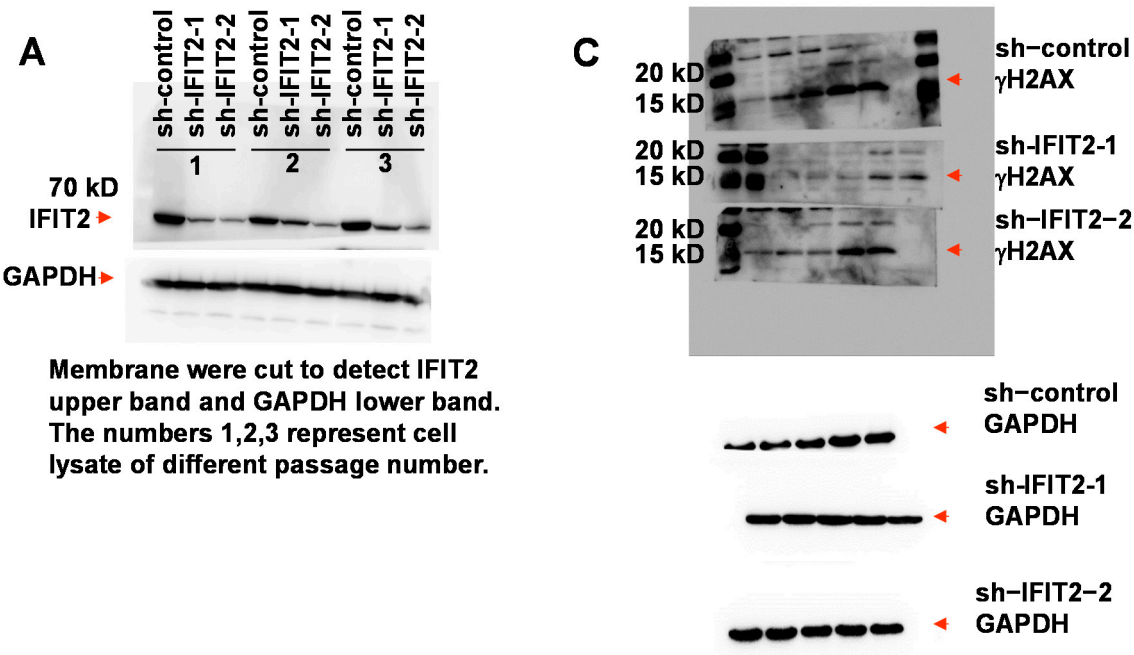

Figure 2B

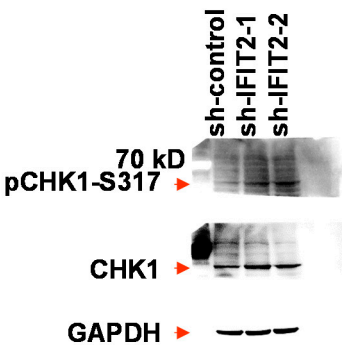

Figure 3C

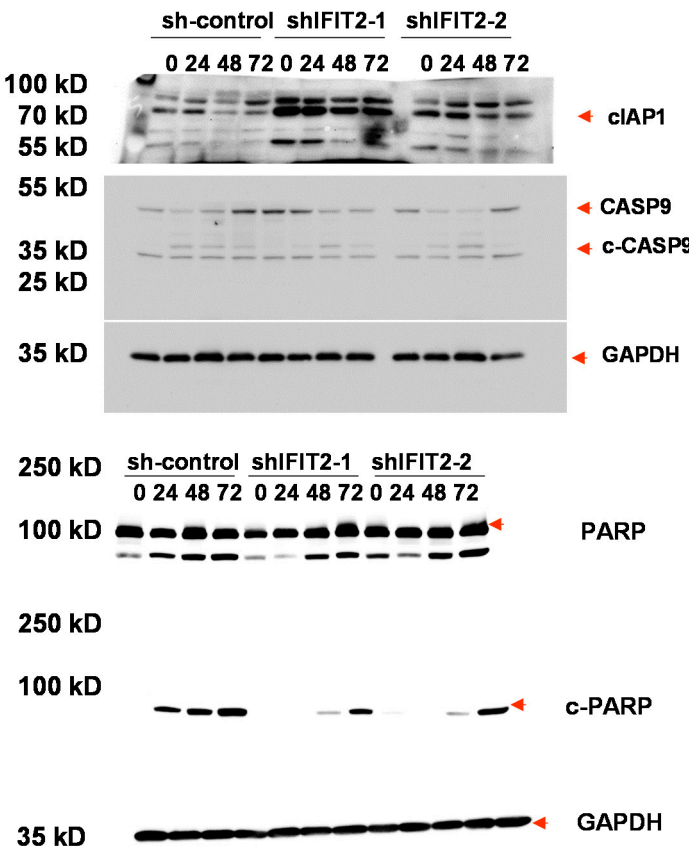

**Figure 4****A**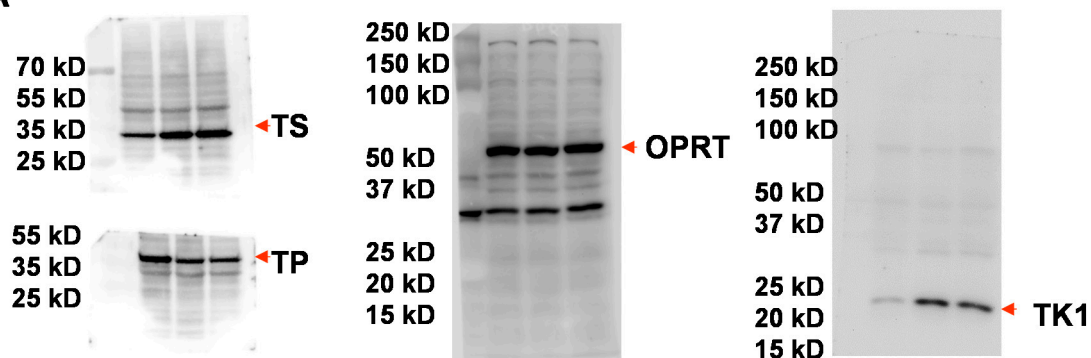**B**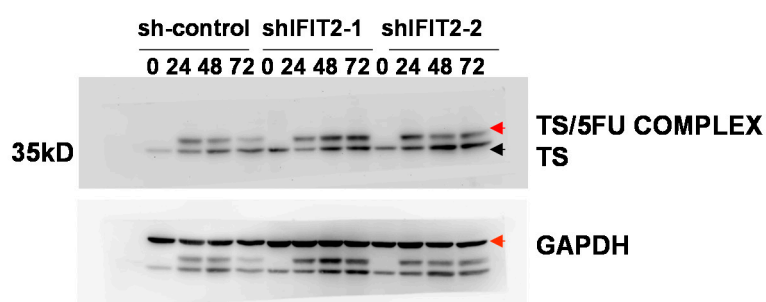**Figure 5A**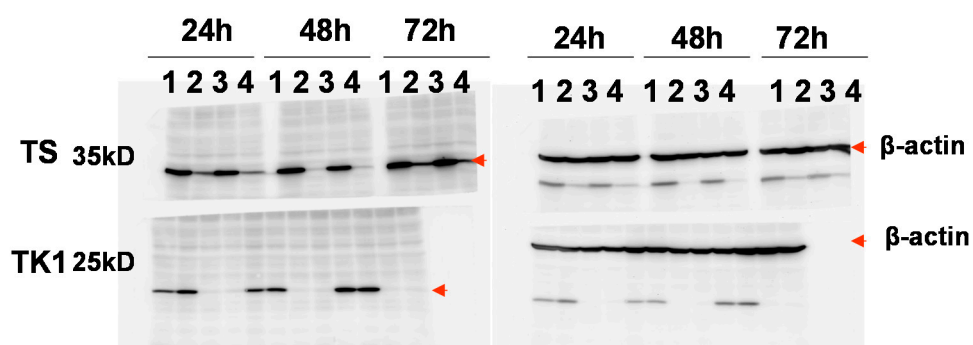

Label 1,2,3,4 represent different siRNA used as follows:

1. CONTROL siRNA

2. TS siRNA

3. TK1 siRNA

4. TS+TK1 siRNA

24h panel represents transfection efficiency after 24h

## Figure 7A

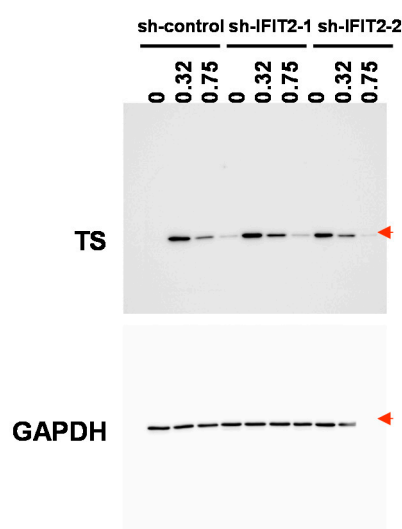

**Figure S4.** Original images of Western blots.

**Publisher's Note:** MDPI stays neutral with regard to jurisdictional claims in published maps and institutional affiliations.

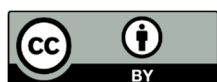

© 2020 by the authors. Licensee MDPI, Basel, Switzerland. This article is an open access article distributed under the terms and conditions of the Creative Commons Attribution (CC BY) license (<http://creativecommons.org/licenses/by/4.0/>).
